# Supplementary material
Source: publisher figshare collection journal article supplement (https://frontiersin.figshare.com/ndownloader/files/24699626)
Supplement: Supplementary file [file 24699626]

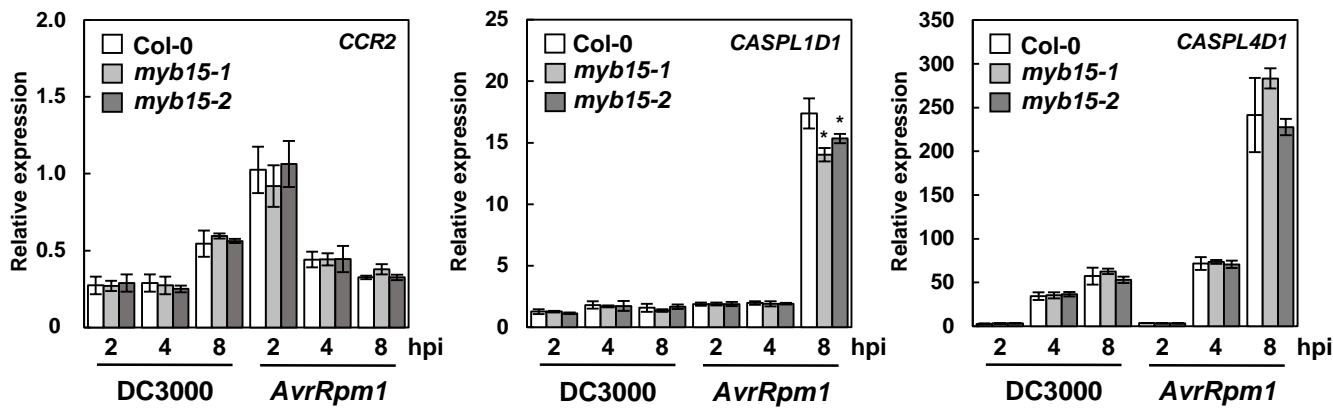

**Figure S1.** Relative expression of *CCR2*, *CASPL1D1*, and *CASPL4D1* as compared to mock (10 mM  $\text{MgCl}_2$ ) treatment after infection with *Pst* DC3000 and *Pst* DC3000 (*AvrRpm1*). Data are means  $\pm$  SD ( $n = 4$ ). Asterisks indicate significant differences from the respective Col-0 ( $t$  test;  $*P < 0.05$ ). Four-week-old leaves were syringe-infiltrated with bacteria at  $10^8$  cfu/ml. hpi, hours post-inoculation; DC3000, *Pst* DC3000; *AvrRpm1*, *Pst* DC3000 (*AvrRpm1*).
